# Supplementary material for: Socioeconomic inequality in hypertension prevalence and care continuum: evidence from rural Bangladesh
Source: Research Square preprint supplement (doi:10.21203/rs.3.rs-8716357/v1), 2026-02-03
Supplement: Supplementary file 1 [file acc4a19ceb3eba5417ad52fb.docx]

**Supplementary Materials**

Socioeconomic inequality in hypertension prevalence and care: evidence from rural Bangladesh

**Supplementary Table S1.** Hypertension prevalence and care continuum, by socioeconomic status

* indicate significantly difference at p<0.05 adjusted for age and sex, compared with low socioeconomic group

¶ indicate significantly difference at p<0.05 adjusted for age and sex, compared with middle socioeconomic group

|  | **Wealth index** | | |  | **Education** | | |
| --- | --- | --- | --- | --- | --- | --- | --- |
| **Low** | **Middle** | **High** |  | **No schooling** | **Primary** | **Secondary** |
| **Prevalence by age** |  |  |  |  |  |  |  |
| 40-49 | 22.2 (18.9-25.5) | 23.1 (20.2-26.0) | 29.3 (26.0-32.7)*¶ |  | 19.0 (15.8-22.2) | 23.9 (21.5-26.3) | 36.8 (31.8-41.7)*¶ |
| 50-59 | 32.4 (28.7-36.0) | 35.9 (32.3-39.5) | 42.9 (39.3-46.5)*¶ |  | 34.3 (31.1-37.5) | 36.6 (33.6-39.7) | 50.5 (44.1-56.9)*¶ |
| 60-100 | 48.6 (45.6-51.7) | 50.0 (46.5-53.5) | 59.1 (55.8-62.4)*¶ |  | 50.4 (47.7-53.1) | 52.9 (50.0-55.8) | 63.6 (57.2-69.9)*¶ |
| **All hypertensive** |  |  |  |  |  |  |  |
| Aware | 24.8 (21.8-27.7) | 29.4 (26.2-32.5) | 47.4 (44.3-50.5)*¶ |  | 25.6 (22.9-28.3) | 35.8 (33.1-38.5)* | 57.0 (51.8-62.3)*¶ |
| Treated | 15.2 (12.8-17.6) | 19.3 (16.6-22.0) | 33.3 (30.4-36.2)*¶ |  | 14.2 (12.1-16.3) | 24.9 (22.4-27.3)* | 44.8 (49.4-50.3)*¶ |
| Controlled | 5.9 (4.3-7.5) | 7.7 (5.9-9.5) | 14.1 (12.0-16.2)*¶ |  | 5.9 (4.5-7.3) | 10.4 (8.7-12.1)* | 17.8 (13.5-22.1)*¶ |
| **Among diagnosed** |  |  |  |  |  |  |  |
| Treated | 61.5 (54.9-68.1) | 66.3 (60.3-72.3) | 70.9 (66.8-75.0)* |  | 56.1 (50.2-62.0) | 70.5 (66.2-74.8)* | 78.4 (72.4-88.5)*¶ |
| Controlled | 23.7 (18.0-29.5) | 26.3 (20.8-31.9) | 30.3 (26.2-34.3) |  | 23.1 (18.2-28.1) | 30.0 (25.4-33.9) | 30.8 (23.8-37.8) |
| **Among treated** |  |  |  |  |  |  |  |
| Controlled | 39.2 (30.7-47.7) | 39.9 (32.2-47.6) | 42.7 (37.4-48.0) |  | 41.6 (33.9-49.3) | 42.3 (36.8-47.9) | 38.6 (30.1-47.2) |

**Supplementary Table S2.** Multivariable models for hypertension prevalence and care continuum, assessing heterogeneity by sex

| Variables * | Prevalence | | Awareness | | Treatment | | Control | |
| --- | --- | --- | --- | --- | --- | --- | --- | --- |
| RR (95% CI) | p-value | RR (95% CI) | p-value | RR (95% CI) | p-value | RR (95% CI) | p-value |
| **Wealth index** |  |  |  |  |  |  |  |  |
| Wealth (ref: low) |  |  |  |  |  |  |  |  |
| Middle | 1.04 (0.90-1.19) | 0.624 | 1.10 (0.82-1.48) | 0.515 | 1.07 (0.74-1.55) | 0.706 | 1.18 (0.66-2.09) | 0.574 |
| High | 1.29 (1.13-1.47) | <0.001 | 1.83 (1.42-2.36) | <0.001 | 2.12 (1.55-2.89) | <0.001 | 2.18 (1.33-3.56) | 0.002 |
| Sex (ref: male) |  |  |  |  |  |  |  |  |
| Female | 1.12 (0.98-1.28) | 0.104 | 1.32 (1.00-1.75) | 0.048 | 1.25 (0.88-1.77) | 0.212 | 1.10 (0.62-1.93) | 0.746 |
| Interaction |  |  |  |  |  |  |  |  |
| Middle * female | 0.98 (0.81-1.19) | 0.850 | 1.12 (0.77-1.64) | 0.549 | 1.32 (0.82-2.12) | 0.246 | 1.22 (0.58-2.59) | 0.597 |
| High * female | 0.94 (0.79-1.13) | 0.539 | 1.01 (0.73-1.41) | 0.932 | 0.98 (0.65-1.48) | 0.930 | 1.10 (0.57-2.11) | 0.771 |
| *P for interaction* |  | *0.818* |  | *0.783* |  | *0.281* |  | *0.867* |
| Age, years (ref: 40-49) |  |  |  |  |  |  |  |  |
| 50-59 | 1.50 (1.34-1.67) | <0.001 | 1.13 (0.94-1.36) | 0.178 | 1.43 (1.14-1.81) | 0.002 | 1.25 (0.90-1.74) | 0.190 |
| 60-100 | 2.09 (1.89-2.32) | <0.001 | 1.04 (0.87-1.23) | 0.693 | 1.26 (1.01-1.58) | 0.043 | 0.88 (0.63-1.23) | 0.455 |
| **Education** |  |  |  |  |  |  |  |  |
| Education (ref: no sch) |  |  |  |  |  |  |  |  |
| Primary | 1.07 (0.95-1.22) | 0.260 | 1.36 (1.04-1.77) | 0.021 | 1.51 (1.08-2.11) | 0.015 | 1.40 (0.85-2.30) | 0.183 |
| Secondary | 1.51 (1.30-1.76) | <0.001 | 2.40 (1.82-3.16) | <0.001 | 3.20 (2.28-4.49) | <0.001 | 2.51 (1.49-4.21) | 0.001 |
| Sex (ref: male) |  |  |  |  |  |  |  |  |
| Female | 1.16 (1.03-1.32) | 0.002 | 1.65 (1.28-2.13) | <0.001 | 1.57 (1.13-2.18) | 0.007 | 1.17 (0.71-1.94) | 0.543 |
| Interaction |  |  |  |  |  |  |  |  |
| Primary * female | 1.00 (0.84-1.18) | 0.874 | 1.00 (0.72-1.37) | 0.781 | 1.18 (0.79-1.76) | 0.420 | 1.37 (1.06-2.10) | 0.313 |
| Secondary * female | 0.83 (0.63-1.10) | 0.204 | 0.80 (0.52-1.22) | 0.214 | 0.83 (0.50-1.40) | 0.492 | 1.13 (0.80-1.60) | 0.333 |
| *P for interaction* |  | *0.384* |  | *0.493* |  | *0.306* |  | *0.532* |
| Age, years (ref: 40-49) |  |  |  |  |  |  |  |  |
| 50-59 | 1.54 (1.38-1.72) | <0.001 | 1.26 (1.04-1.52) | 0.058 | 1.67 (1.32-2.12) | <0.001 | 1.50 (1.06-2.10) | 0.021 |
| 60+ | 2.18 (1.97-2.42) | <0.001 | 1.21 (1.01-1.45) | 0.241 | 1.60 (1.27-2.02) | <0.001 | 1.13 (0.80-1.60) | 0.483 |

***** Poisson models with community cluster random effects estimating relative risk (RR) and 95% confidence interval of socioeconomic inequalities in hypertension prevalence, awareness, treatment and control. P-values in *italic* represented joint-significance of all interaction terms.

**Supplementary Table S3.** Factors associated with hypertension prevalence and care continuum

| Socioeconomic characteristics | Prevalence |  | Awareness among HTN |  | Treatment among diagnosed |  | Controlled among diagnosed |  | Controlled among treated |
| --- | --- | --- | --- | --- | --- | --- | --- | --- | --- |
| RR (95% CI) |  | RR (95% CI) |  | RR (95% CI) |  | RR (95% CI) |  | RR (95% CI) |
| **Behavioral** |  |  |  |  |  |  |  |  |  |
| Insufficient physical activity | 1.15 (1.06-1.25) |  | 1.18 (1.02-1.36) |  | 0.89 (0.75-1.05) |  | 0.99 (0.81-1.23) |  | 1.08 (0.83-1.41) |
| Ever smoked | 0.96 (0.86-1.07) |  | 0.91 (0.75-1.11) |  | 1.03 (0.81-1.30) |  | 1.27 (0.94-1.71) |  | 1.46 (1.00-2.11) |
| <5 serving fruit/vegetable | 0.99 (0.90-1.08) |  | 1.15 (0.99-1.34) |  | 1.14 (0.95-1.35) |  | 1.10 (0.88-1.36) |  | 1.12 (0.86-1.46) |
| **Family history** |  |  |  |  |  |  |  |  |  |
| Premature cardiovascular disease | 1.19 (1.06-1.34) |  | 1.15 (0.95-1.38) |  | 0.99 (0.79-1.23) |  | 0.84 (0.63-1.12) |  | 0.86 (0.60-1.23) |
| Diabetes | 1.08 (0.97-1.19) |  | 1.21 (1.03-1.41) |  | 1.00 (0.83-1.21) |  | 1.06 (0.85-1.32) |  | 1.07 (0.80-1.42) |
| **Comorbidity/risk factors** |  |  |  |  |  |  |  |  |  |
| Diabetes | 1.33 (1.22-1.48) |  | 1.62 (1.40-1.86) |  | 1.16 (0.98-1.37) |  | 1.02 (0.83-1.26) |  | 0.93 (0.72-1.21) |
| Cardiovascular disease | 1.73 (1.46-2.04) |  | 2.43 (2.01-2.94) |  | 1.09 (0.87-1.37) |  | 0.80 (0.58-1.09) |  | 0.71 (0.48-1.05) |
| BMI > 23 kg/m2 | 1.49 (1.38-1.62) |  | 1.44 (1.25-1.66) |  | 1.08 (0.91-1.28) |  | 0.86 (0.71-1.06) |  | 0.85 (0.65-1.10) |
| Central obesity | 1.53 (1.41-1.66) |  | 1.43 (1.24-1.65) |  | 1.11 (0.94-1.32) |  | 0.84 (0.68-1.02) |  | 0.82 (0.63-1.06) |
| **Care seeking** ¶ |  |  |  |  |  |  |  |  |  |
| Checked BP in the past 12 month | -- |  | -- |  | -- |  | -- |  | 1.02 (0.75-1.40) |
| Travel time to health facility<30mins | -- |  | -- |  | -- |  | -- |  | 0.95 (0.74-1.22) |
| Using public facilities for BP check | -- |  | -- |  | -- |  | -- |  | 1.18 (0.84-1.67) |
| Getting medication from public facilities | -- |  | -- |  | -- |  | -- |  | 1.25 (0.82-1.90) |
| **Knowledge and self-care** ¶ |  |  |  |  |  |  |  |  |  |
| Low self-reported adherence to med | -- |  | -- |  | -- |  | -- |  | 0.97 (0.75-1.24) |
| Using herb/traditional medicine | -- |  | -- |  | -- |  | -- |  | 0.63 (0.34-1.20) |

Abbreviations: RR, relative risk; BMI, body mass index; BP, blood pressure; HTN, hypertension

* Estimates adjusted to age and sex, wealth, and education.

¶ “--" associations not estimated, because the covariates only measured among those who were on treatment.

**Supplementary Table S4.** Characteristics of hypertensive participants currently on treatment by socioeconomic status

| Characteristics | Wealth index | | | p-values |  | Education | | | p-values |
| --- | --- | --- | --- | --- | --- | --- | --- | --- | --- |
| Low | Median | High |  | No schooling | Primary | Secondary |
| **Care seeking** |  |  |  |  |  |  |  |  |  |
| Checked BP in the past 12 month | 79.1 | 79.0 | 81.4 | 0.755 |  | 75.5 | 80.9 | 85.3 | 0.135 |
| Time spent travelling to health facility<30mins | 46.8 | 51.1 | 39.4 | 0.049 |  | 48.5 | 43.5 | 38.6 | 0.285 |
| Using public facilities for BP check | 23.5 | 10.7 | 10.2 | 0.001 |  | 17.0 | 15.4 | 6.1 | 0.003 |
| Getting medication from public facilities | 12.7 | 8.6 | 6.1 | 0.049 |  | 12.7 | 7.8 | 3.7 | 0.039 |
| **Knowledge and self-care** |  |  |  |  |  |  |  |  |  |
| Low self-reported adherence to medication | 61.5 | 61.3 | 59.9 | 0.930 |  | 64.5 | 61.4 | 54.2 | 0.235 |
| Adherence to physical activity | 40.5 | 46.2 | 39.7 | 0.375 |  | 41.2 | 40.9 | 42.1 | 0.971 |
| Adherence to diet | 80.9 | 76.3 | 59.2 | <0.001 |  | 80.9 | 67.4 | 54.8 | <0.001 |
| Not currently smoking | 80.0 | 77.1 | 91.2 | 0.013 |  | 87.1 | 84.7 | 87.5 | 0.818 |
| Using herb/traditional medicine | 6.1 | 3.8 | 6.7 | 0.508 |  | 2.6 | 6.3 | 10.5 | 0.042 |

Abbreviations: BP, blood pressure

Data are %s. Estimates adjusted to age and sex structure of the subsample.

**Supplementary Table S5.** Explained components of Blinder-Oaxaca decomposition of socioeconomic differences in hypertension prevalence and awareness

|  | Middle vs low wealth § | High vs low group § |  | Primary vs no education § | Secondary or higher vs no education § |
| --- | --- | --- | --- | --- | --- |
| **Prevalence** |  |  |  |  |  |
| Age | 3.5 (0.5) | 2.4 (0.5) |  | 5.0 (0.5) | 7.2 (0.8) |
| Sex | -- | -- |  | -- | -- |
| Insufficient PA | -- | -- |  | 0.2 (0.1) | -- |
| Diet | -- | -- |  | -- | -- |
| Tobacco use | -- | -- |  | -- | -- |
| Family history of CVD | -- | -0.3 (0.1) |  | -0.3 (0.1) | -- |
| Family history of DM | -- | -- |  | -- | -- |
| DM | -0.3 (0.1) | -1.2 (0.3) |  | -0.3 (0.1) | -1.0 (0.3) |
| CVD | -- | -0.6 (0.2) |  | -- | -1.4 (0.3) |
| Overweight or obesity | -0.8 (0.2) | -2.4 (0.5) |  | -0.8 (0.2) | -2.8 (0.7) |
| Central obesity | -0.5 (0.2) | -2.1 (0.5) |  | -0.8 (0.2) | -1.7 (0.5) |
| **Awareness** |  |  |  |  |  |
| Age | -- | -- |  | 0.7 (0.3) | 1.9 (0.9) |
| Sex | -- | 0.5 (0.2) |  | 1.2 (0.3) | 4.1 (1.2) |
| Insufficient PA | -- | -- |  | 0.3 (0.1) | -- |
| Diet | -0.5 (0.2) | -- |  | -0.7 (0.3) | -- |
| Tobacco use | -- | -- |  | -- | -- |
| Family history of CVD | -- | -- |  | -- | -1.3 (0.5) |
| Family history of DM | -- | -- |  | -- | -1.7 (0.8) |
| DM | -0.7 (0.3) | -2.7 (0.6) |  | -0.9 (0.3) | -1.7 (0.5) |
| CVD | -- | -1.7 (0.6) |  | -- | -3.9 (0.9) |
| Overweight or obesity | -0.7 (0.3) | -2.9 (1.0) |  | -1.0 (0.4) | -3.2 (1.2) |
| Central obesity | -- | -- |  | -0.6 (0.3) | -- |

Abbreviations: CVD cardiovascular disease; DM diabetes Mellitus.

Results are percentage points difference (standard error) in prevalence and awareness related to explained component of socioeconomic differences associated with each individual-level factor. “--” indicates factors that do not significantly explains the socioeconomic inequality in prevalence and awareness.
